# Supplementary material for: A mutation in the ZNF687 gene that is responsible for the severe form of Paget’s disease of bone causes severely altered bone remodeling and promotes hepatocellular carcinoma onset in a knock-in mouse model
Source: PubMed Central journal article supplement (PMC10014847; doi:10.1038/s41413-023-00250-3), 2023-03-14

Figure S4

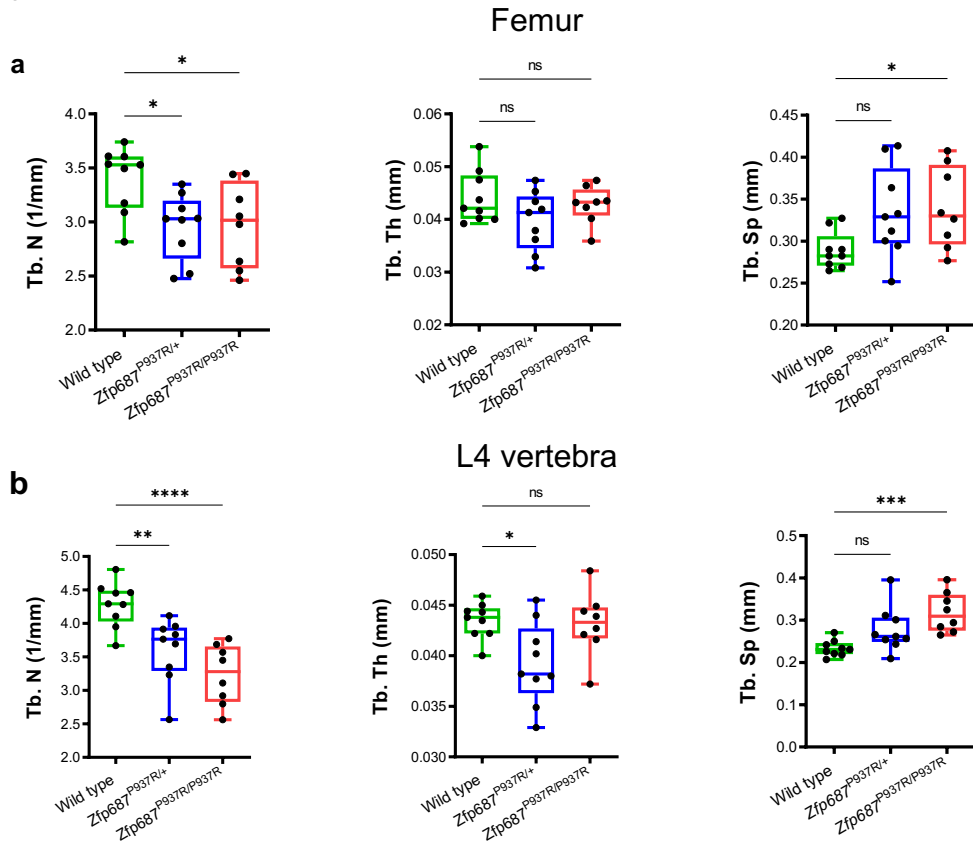

Supplement: 41413_2023_250_MOESM4_ESM.pdf [file 41413_2023_250_MOESM4_ESM.pdf]
